# Supplementary material for: A Fluorescent Cy7-Mercaptopyridine for the Selective Detection of Glutathione over Homocysteine and Cysteine
Source: MDPI journal article supplement (doi:10.3390/s18092897), 2018-09-01
Supplement: s1 [file s1]

# A Fluorescent Cy7-Mercaptopyridine for the Selective Detection of Glutathione over Homocysteine and Cysteine

Shin A Yoon <sup>1,†</sup>, Wantae Kim <sup>2,†</sup>, Amit Sharma <sup>3,†</sup>, Peter Verwilt <sup>3</sup>, Miae Won <sup>3</sup> and Min Hee Lee <sup>1,\*</sup>

<sup>1</sup> Department of Chemistry, Sookmyung Women's University, Seoul 04310, Korea; dbstlsdk23@sookmyung.ac.kr

<sup>2</sup> School of Chemical and Biological Engineering, Seoul National University, Seoul 151-742, Korea; wtkim223@naver.com

<sup>3</sup> Department of Chemistry, Korea University, Seoul 02841, Korea; amitorg83@gmail.com (A.S.); peterverwilt@hotmail.com (P.V.); miaewon@korea.ac.kr (M.W.)

\* Correspondence: minheelee@sookmyung.ac.kr; Tel.: +82-02-2077-7815

† These authors contributed equally.

## Contents

### 1. Supplementary data

### 2. <sup>1</sup>H- <sup>13</sup>C-NMR, and ESI-MS spectra of **1**

### 3. Computational data

## 1. Supplementary data

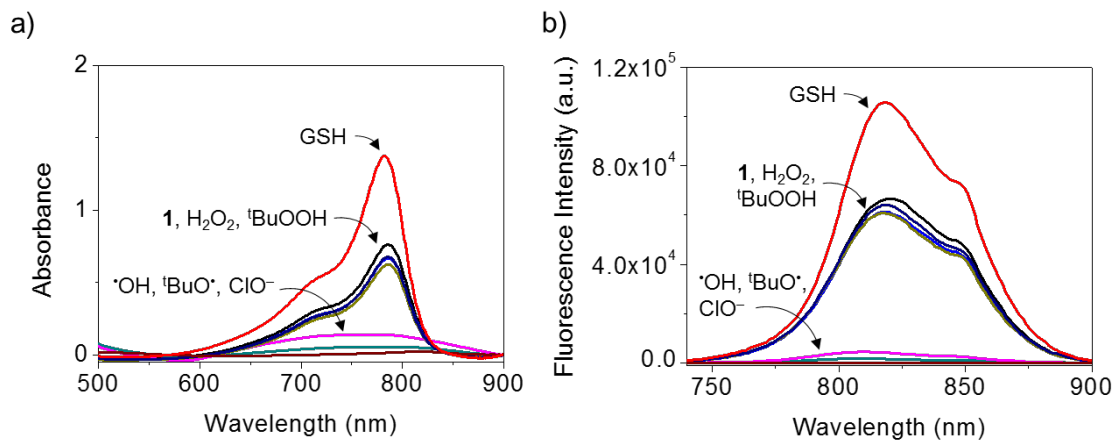

**Figure S1.** (a) UV-Vis absorption and (b) fluorescence spectra of **1** (10  $\mu$ M) in presence of reactive oxygen species such as  $\cdot\text{O}_2^-$ ,  $\cdot\text{OH}$ ,  $t\text{-BuO}\cdot$ ,  $\text{H}_2\text{O}_2$ ,  $t\text{-BuOOH}$ , and  $\text{ClO}^-$  (1 mM, respectively). All data was obtained in HEPES buffer (10 mM, pH 7.4) containing 1% (*v/v*) of DMSO after incubation of 1 h at room temperature. The excitation wavelength was affected at 720 nm.

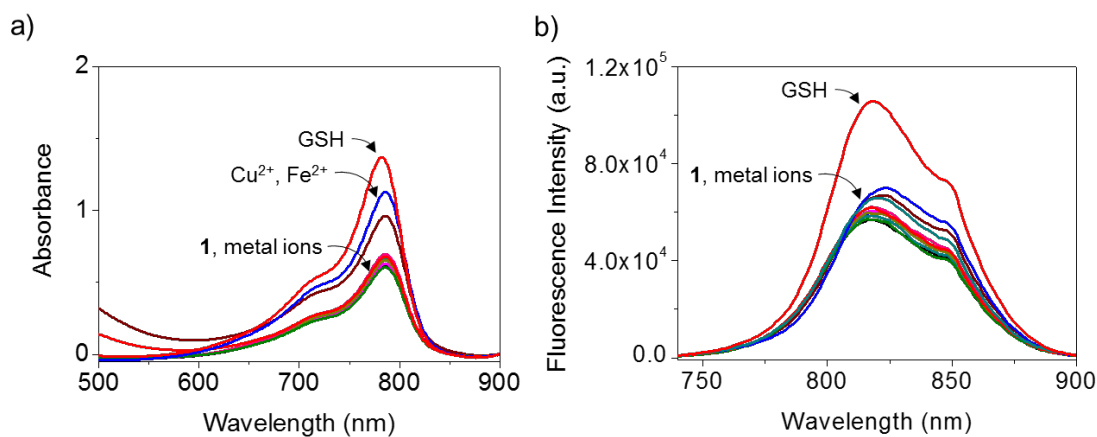

**Figure S2.** (a) UV-Vis absorption and (b) fluorescence spectra of **1** (10  $\mu$ M) in presence of various anions such as various metal ions  $\text{Na}^+$ ,  $\text{K}^+$ ,  $\text{Mg}^{2+}$ ,  $\text{Ca}^{2+}$ ,  $\text{Fe}^{2+}$ ,  $\text{Co}^{2+}$ ,  $\text{Zn}^{2+}$ ,  $\text{Fe}^{3+}$ ,  $\text{Cu}^{2+}$ , and  $\text{Cu}^+$  (1 mM, respectively). All data was obtained in HEPES buffer (10 mM, pH 7.4) containing 1% (*v/v*) of DMSO after incubation of 1 h at room temperature. The excitation wavelength was affected at 720 nm.

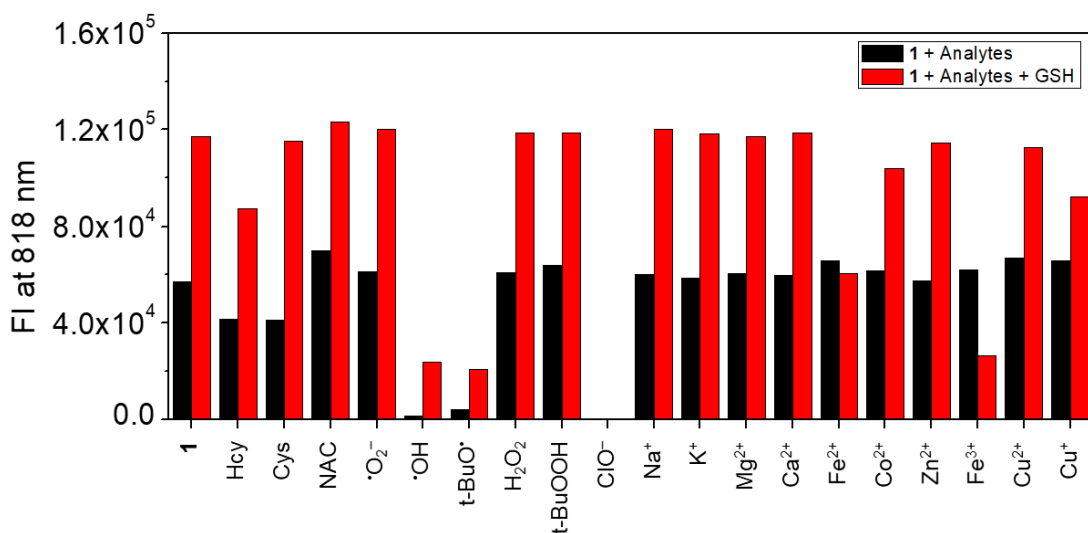

**Figure S3.** Relative fluorescence intensity at 818 nm of **1** (10  $\mu$ M) in the absence and presence of GSH with other analytes such as thiols (10 mM), ROS (1 mM), and metals (1 mM). Black bars indicate fluorescence intensity of **1** in the absence and presence of various analytes. Red bars indicate fluorescence intensity of **1** towards GSH in the presence of other analytes. All data were obtained in HEPES buffer (10 mM, pH 7.4) containing 1% (*v/v*) of DMSO after incubation of **1** h at room temperature. The excitation wavelength was affected at 720 nm.

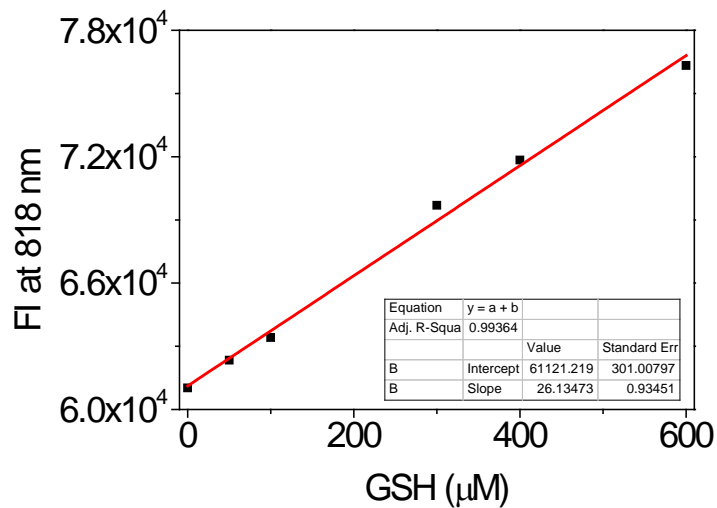

**Figure S4.** Plot of fluorescence intensity at 818 nm of **1** vs. [GSH] in the range of 0-600  $\mu$ M.

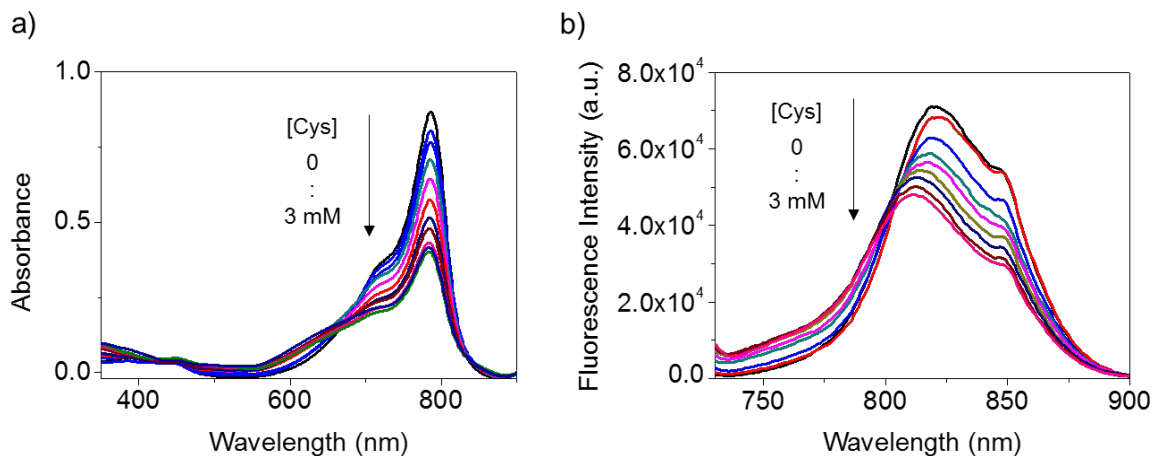

**Figure S5.** (a) Absorption and (b) fluorescence spectra of **1** (10 μM) in presence of different concentrations of Cys (0-3 mM). All data was obtained in HEPES buffer (10 mM, pH 7.4) containing 1% (*v/v*) of DMSO after incubation of 1 h at room temperature. The excitation wavelength was affected at 720 nm.

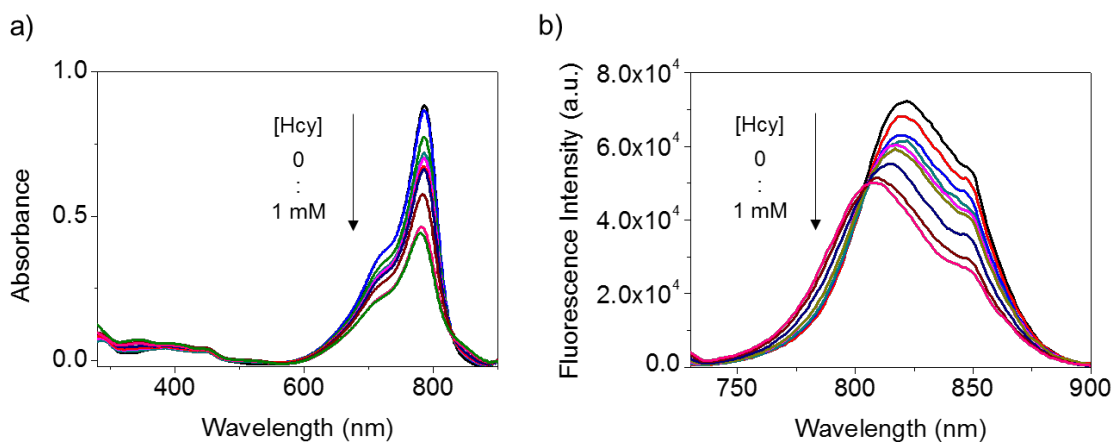

**Figure S6.** (a) Absorption and (b) fluorescence spectra of **1** (10 μM) in presence of different concentrations of Hcy (0-1 mM). All data was obtained in HEPES buffer (10 mM, pH 7.4) containing 1% (*v/v*) of DMSO after incubation of 1 h at room temperature. The excitation wavelength was affected at 720 nm.

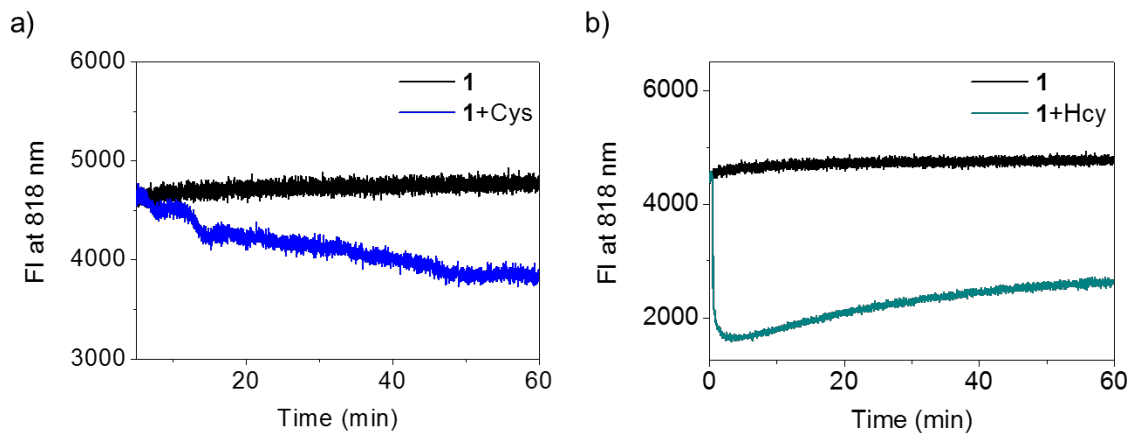

**Figure S7.** Time-dependent fluorescence responses of **1** (10  $\mu$ M) toward (a) Cys and (b) Hcy (10 mM) in HEPES buffer (0.01 M, pH 7.4) containing 1% (*v/v*) of DMSO.

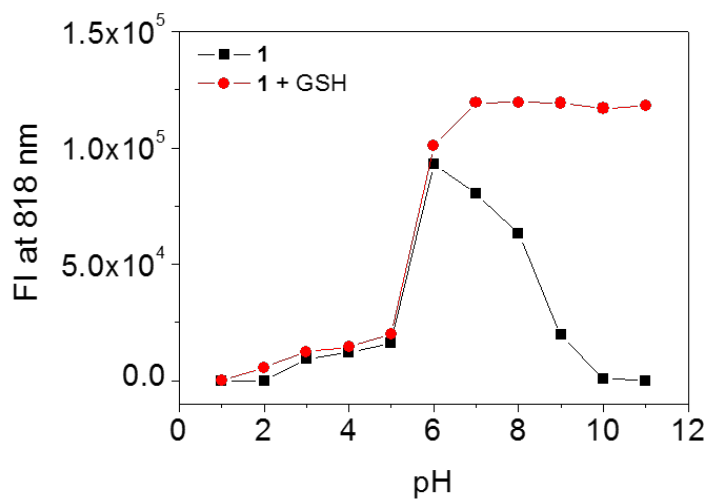

**Figure S8.** The pH effect on fluorescence change of **1** (10  $\mu$ M) in absence (black line) and presence (red line) of GSH (10 mM). All data was obtained in HEPES buffer (10 mM, pH 7.4) containing 1% (*v/v*) of DMSO after incubation of 1 h at room temperature. The excitation wavelength was affected at 720 nm.

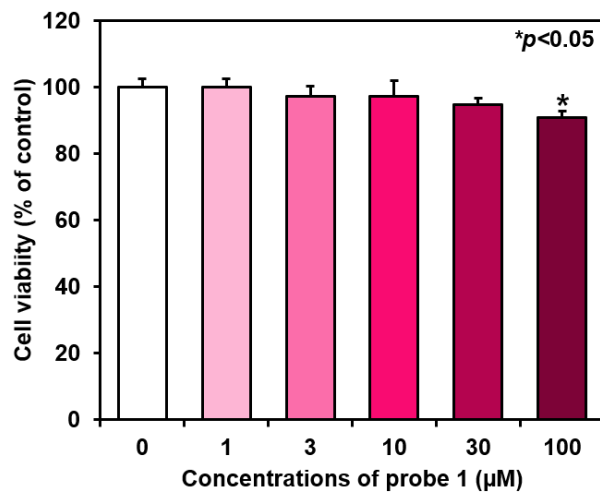

**Figure S9.** Cell viability of probe **1**. Cells were incubated with 0, 1, 3, 10, 30 and 100 μM of probe **1** for 6 h in MDA-MB-231 cells. The values represent mean ± SE of three independent experiments performed in triplicate

## 2. $^1\text{H}$ , $^{13}\text{C}$ NMR and ESI-MS spectra of **1**

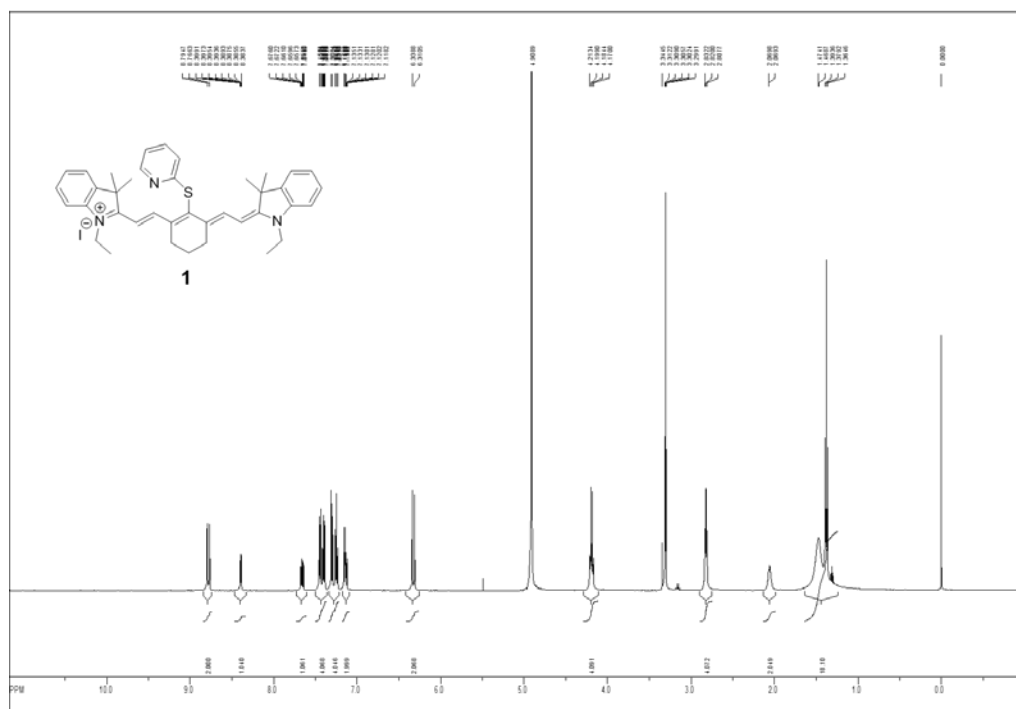

**Figure S10.**  $^1\text{H}$ -NMR spectrum of **1** in  $\text{DMSO}-d_6$ .

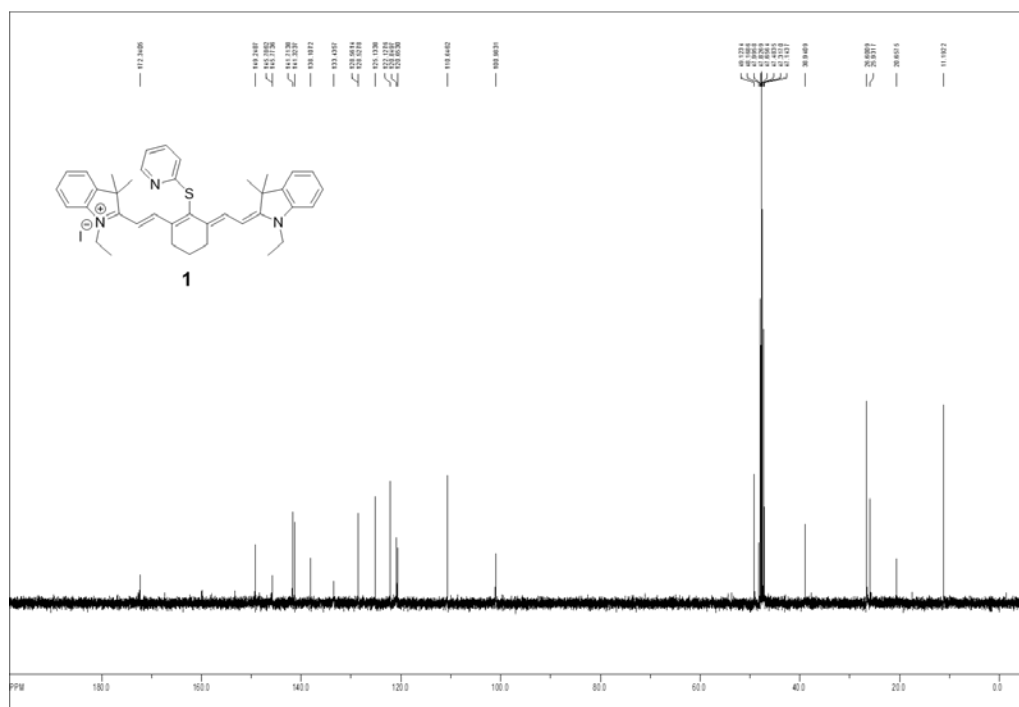

**Figure S11.** <sup>13</sup>C-NMR spectrum of **1** in DMSO-*d*<sub>6</sub>.

Line#:1 R.Time:0.780(Scan#:157)  
 MassPeaks:687  
 RawMode:Single 0.780(157) BasePeak:586.30(4749984)  
 BG Mode:None Segment 1 - Event 1

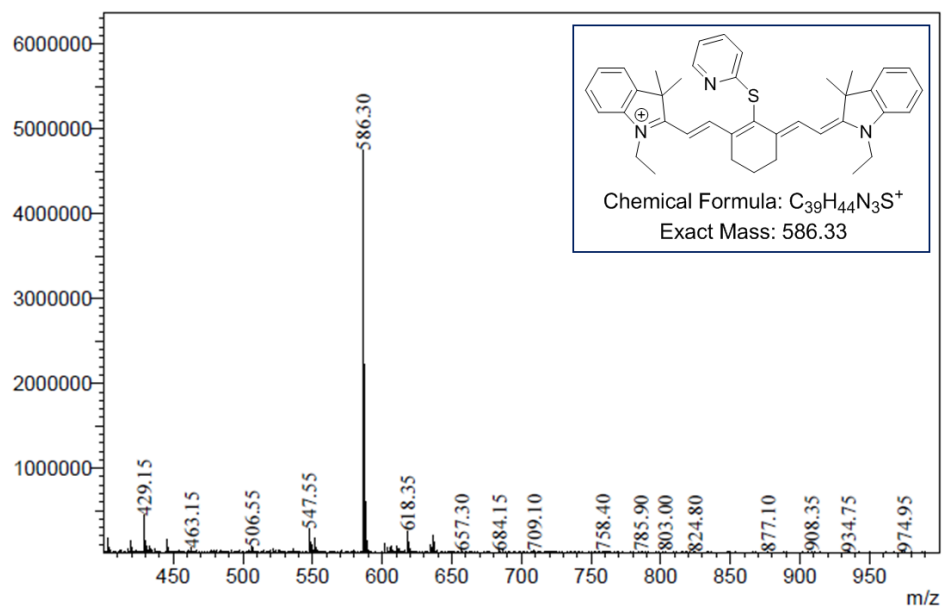

**Figure S12.** ESI-MS spectrum of **1**.

### 3. Computational data

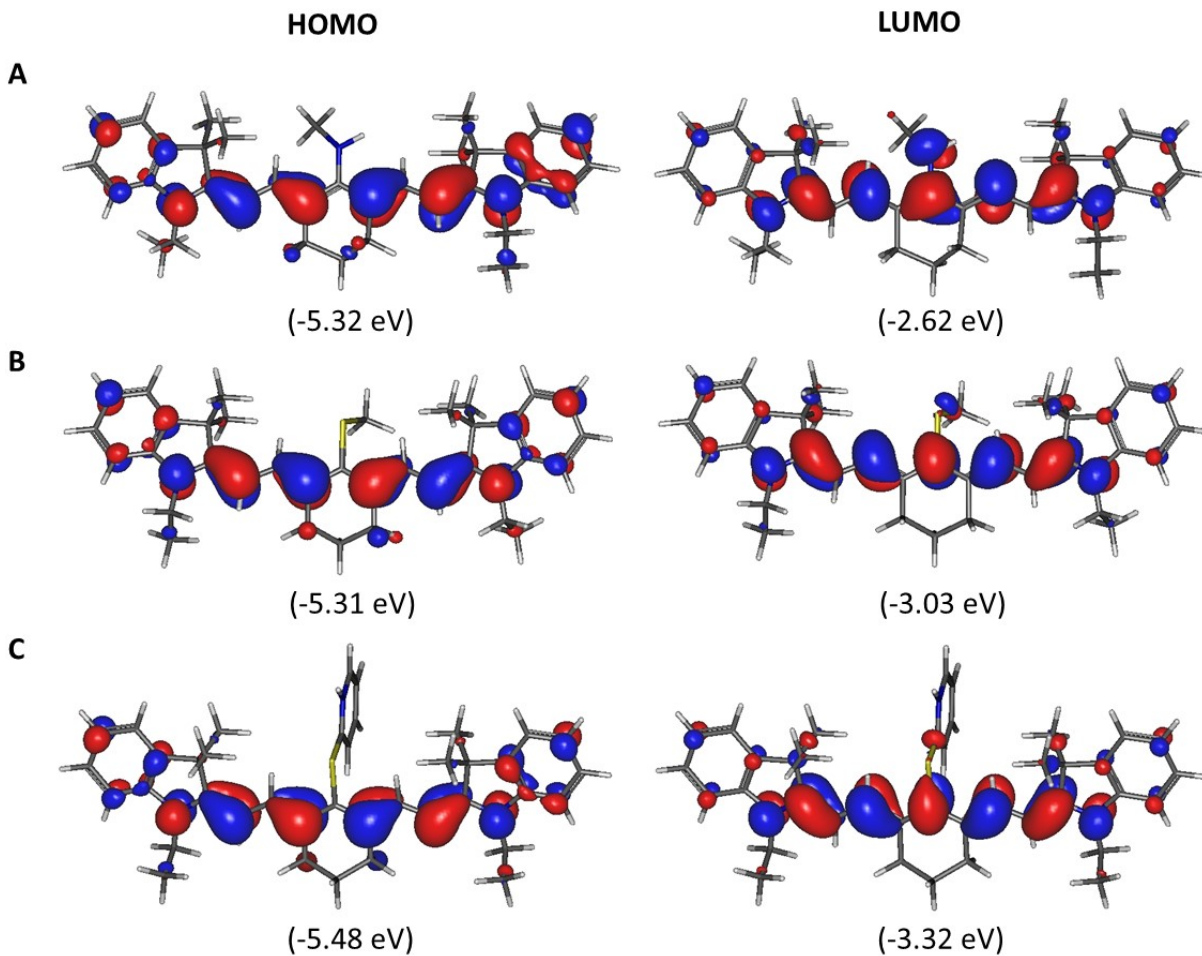

**Figure S13.** Isodensity surface (0.03 e.bohr<sup>-3</sup>) of the HOMO (Left) and LUMO (Right) orbitals of a) Cy7-NHMe, b) Cy7-SMe and c) 1-H<sup>+</sup> at the PCM-PBE0/6-311G(2d,p) level of theory. The associated orbital energies are shown between brackets in eV.

**Table S1.** Coordinates of optimized structures

**1-GSH** E(RωB97XD) = -3478.927477 Ha

| Center<br>Number | Atomic<br>Number | Coordinates (Angstroms) |           |           |
|------------------|------------------|-------------------------|-----------|-----------|
|                  |                  | X                       | Y         | Z         |
| 1                | 1                | 0.483239                | -0.429076 | -3.761788 |
| 2                | 1                | 5.320828                | -1.085730 | -4.004515 |
| 3                | 1                | 6.979636                | -1.716872 | -3.971111 |
| 4                | 1                | 0.289969                | 1.205775  | -4.406272 |
| 5                | 6                | 6.377155                | -0.802676 | -3.955926 |
| 6                | 1                | 4.448214                | -3.452245 | -0.620372 |
| 7                | 1                | -1.810459               | 0.420070  | -3.351126 |
| 8                | 6                | 0.329444                | 0.621040  | -3.480535 |



|    |    |           |           |           |
|----|----|-----------|-----------|-----------|
| 9  | 6  | -0.987529 | 0.763004  | -2.721307 |
| 10 | 1  | 3.247457  | -2.632360 | 0.392895  |
| 11 | 6  | 4.303444  | -2.901286 | 0.314307  |
| 12 | 1  | 4.538522  | -3.570515 | 1.148811  |
| 13 | 1  | 4.133871  | 0.375368  | -2.338972 |
| 14 | 6  | 6.666832  | 0.010712  | -2.695788 |
| 15 | 6  | 1.555090  | 0.348943  | -1.302243 |
| 16 | 1  | -1.165517 | 1.830344  | -2.519123 |
| 17 | 6  | 4.008565  | -0.171753 | -1.411122 |
| 18 | 1  | 9.094300  | -1.317632 | -1.984280 |
| 19 | 6  | 2.692996  | -0.187875 | -0.811527 |
| 20 | 7  | 6.359734  | -0.711779 | -1.476469 |
| 21 | 6  | 0.233787  | 0.277426  | -0.533533 |
| 22 | 6  | 5.103962  | -0.788958 | -0.892816 |
| 23 | 6  | 8.618053  | -1.751411 | -1.110722 |
| 24 | 1  | 7.722062  | 0.295476  | -2.657847 |
| 25 | 6  | 7.282193  | -1.511149 | -0.803341 |
| 26 | 1  | 2.618609  | -0.687805 | 0.145541  |
| 27 | 1  | 10.385267 | -2.792005 | -0.473664 |
| 28 | 6  | 9.340699  | -2.589578 | -0.254059 |
| 29 | 6  | 5.217853  | -1.663767 | 0.370511  |
| 30 | 6  | 6.671613  | -2.094253 | 0.308585  |
| 31 | 16 | 0.320810  | -0.738257 | 1.007043  |
| 32 | 6  | 8.745414  | -3.168713 | 0.865696  |
| 33 | 6  | 7.395149  | -2.919903 | 1.149785  |
| 34 | 1  | 9.325596  | -3.816815 | 1.515573  |
| 35 | 6  | 4.967070  | -0.849084 | 1.654799  |
| 36 | 1  | 3.929675  | -0.510049 | 1.727021  |
| 37 | 1  | 5.180372  | -1.470673 | 2.531159  |
| 38 | 1  | 5.619324  | 0.029348  | 1.689745  |
| 39 | 6  | 0.283786  | -2.432433 | 0.530907  |
| 40 | 7  | -0.115486 | -3.269819 | 1.514596  |
| 41 | 6  | -0.134233 | -4.607301 | 1.373555  |
| 42 | 6  | 0.237106  | -5.184926 | 0.179218  |
| 43 | 6  | 0.623255  | -4.347612 | -0.870773 |
| 44 | 6  | 0.653831  | -2.970214 | -0.699926 |
| 45 | 1  | -0.468936 | -5.168838 | 2.236757  |
| 46 | 1  | 0.215029  | -6.261543 | 0.068739  |
| 47 | 1  | 0.912080  | -4.772582 | -1.826198 |
| 48 | 1  | 6.618378  | -0.215189 | -4.847515 |
| 49 | 1  | -3.338765 | -4.372777 | -1.211652 |
| 50 | 1  | 2.430610  | 0.987386  | -3.157894 |
| 51 | 6  | 1.491075  | 1.098390  | -2.612688 |
| 52 | 1  | -2.213922 | -3.386514 | -0.270677 |
| 53 | 6  | -3.211512 | -3.831210 | -0.269039 |
| 54 | 1  | -3.268788 | -4.551474 | 0.554133  |
| 55 | 1  | -3.447499 | -0.373089 | -2.601972 |
| 56 | 6  | -0.978341 | 0.001648  | -1.415607 |
| 57 | 1  | 1.365466  | 2.173551  | -2.418239 |
| 58 | 6  | -3.277429 | -0.953266 | -1.702022 |
| 59 | 1  | -8.092454 | -2.826336 | -2.615174 |
| 60 | 6  | -2.018725 | -0.760681 | -1.013024 |
| 61 | 7  | -5.507687 | -1.848340 | -1.932179 |
| 62 | 6  | -4.282923 | -1.769020 | -1.286598 |
| 63 | 1  | 6.098351  | 0.945794  | -2.693563 |
| 64 | 6  | -7.589185 | -3.244439 | -1.749180 |

|     |    |           |           |           |
|-----|----|-----------|-----------|-----------|
| 65  | 6  | -6.320368 | -2.825920 | -1.360030 |
| 66  | 1  | -9.196761 | -4.585387 | -1.270709 |
| 67  | 6  | -8.205749 | -4.242749 | -0.986366 |
| 68  | 6  | -4.300923 | -2.756516 | -0.105965 |
| 69  | 6  | -5.671238 | -3.388551 | -0.259201 |
| 70  | 6  | -7.572326 | -4.804360 | 0.121345  |
| 71  | 6  | -6.289396 | -4.374098 | 0.488598  |
| 72  | 1  | -8.069858 | -5.578958 | 0.697064  |
| 73  | 1  | -5.789414 | -4.814309 | 1.348164  |
| 74  | 6  | -4.194840 | -2.052052 | 1.260088  |
| 75  | 1  | -3.206445 | -1.617247 | 1.429603  |
| 76  | 1  | -4.374425 | -2.777734 | 2.060497  |
| 77  | 1  | -4.941047 | -1.255641 | 1.344325  |
| 78  | 8  | 1.074080  | 7.128943  | -1.823685 |
| 79  | 6  | 0.297534  | 8.048150  | -1.508744 |
| 80  | 8  | 0.037076  | 9.111816  | -2.132686 |
| 81  | 6  | -0.434969 | 7.891282  | -0.137205 |
| 82  | 7  | -1.418884 | 9.023189  | -0.054486 |
| 83  | 1  | 0.302448  | 8.059869  | 0.652238  |
| 84  | 16 | 0.050914  | 1.980186  | 0.279793  |
| 85  | 6  | -1.101776 | 6.535632  | 0.046770  |
| 86  | 1  | -0.327000 | 5.784058  | -0.129832 |
| 87  | 6  | -1.710492 | 6.333669  | 1.443592  |
| 88  | 1  | -1.869477 | 6.389616  | -0.723344 |
| 89  | 6  | -2.262866 | 4.925390  | 1.550170  |
| 90  | 1  | -2.542339 | 7.023552  | 1.618941  |
| 91  | 1  | -0.950344 | 6.520097  | 2.209621  |
| 92  | 8  | -3.340257 | 4.609877  | 1.036669  |
| 93  | 7  | -1.470452 | 4.035389  | 2.181987  |
| 94  | 6  | -1.783001 | 2.627549  | 2.289832  |
| 95  | 1  | -0.630007 | 4.333177  | 2.664858  |
| 96  | 7  | -1.070670 | 0.764953  | 3.716685  |
| 97  | 1  | -2.827157 | 2.516720  | 2.608690  |
| 98  | 6  | -1.654306 | 1.910132  | 0.937478  |
| 99  | 1  | -1.946302 | 0.862941  | 1.040989  |
| 100 | 1  | -2.342373 | 2.373446  | 0.228133  |
| 101 | 6  | -0.872252 | 2.047771  | 3.388638  |
| 102 | 8  | -0.017989 | 2.756488  | 3.931247  |
| 103 | 1  | -1.716583 | 0.177282  | 3.200756  |
| 104 | 6  | -0.192145 | 0.056510  | 4.627333  |
| 105 | 1  | 0.836270  | 0.399548  | 4.480995  |
| 106 | 1  | -0.458339 | 0.267942  | 5.669747  |
| 107 | 6  | -0.232473 | -1.463229 | 4.403852  |
| 108 | 8  | -1.100823 | -1.904984 | 3.584706  |
| 109 | 8  | 0.599752  | -2.139183 | 5.035089  |
| 110 | 1  | -0.479250 | -2.842955 | 2.417299  |
| 111 | 1  | -1.406855 | 9.524690  | 0.834027  |
| 112 | 1  | -2.379877 | 8.728897  | -0.239745 |
| 113 | 1  | -1.932006 | -1.252279 | -0.052738 |
| 114 | 1  | 0.971179  | -2.312328 | -1.499154 |
| 115 | 6  | -5.874783 | -1.093357 | -3.114528 |
| 116 | 6  | -5.405249 | -1.755071 | -4.408797 |
| 117 | 1  | -6.962617 | -0.980887 | -3.114335 |
| 118 | 1  | -4.316143 | -1.865346 | -4.418936 |
| 119 | 1  | -5.698624 | -1.147603 | -5.270858 |
| 120 | 1  | -5.852818 | -2.748437 | -4.517657 |

|     |   |           |           |           |
|-----|---|-----------|-----------|-----------|
| 121 | 1 | -5.463575 | -0.083650 | -3.018967 |
| 122 | 1 | 6.926445  | -3.374258 | 2.019556  |
| 123 | 1 | -1.126660 | 9.653517  | -0.833367 |

**1-GSH** *cyclic* E(RωB97XD) = -2796.2942764 Ha

| Center<br>Number | Atomic<br>Number | Coordinates (Angstroms) |           |           |
|------------------|------------------|-------------------------|-----------|-----------|
|                  |                  | X                       | Y         | Z         |
| -----            |                  |                         |           |           |
| 1                | 1                | 0.392346                | -2.187775 | -2.603838 |
| 2                | 1                | 4.815273                | -3.427146 | -1.976874 |
| 3                | 1                | 6.413096                | -3.961864 | -1.417879 |
| 4                | 1                | 0.169798                | -1.763258 | -4.305902 |
| 5                | 6                | 5.888627                | -3.386774 | -2.188027 |
| 6                | 1                | 4.161603                | -1.719863 | 1.811858  |
| 7                | 1                | -1.872678               | -1.320788 | -2.962717 |
| 8                | 6                | 0.245544                | -1.347647 | -3.294998 |
| 9                | 6                | -1.043812               | -0.609973 | -2.950903 |
| 10               | 1                | 3.173759                | -0.248755 | 1.709614  |
| 11               | 6                | 4.187782                | -0.626819 | 1.861361  |
| 12               | 1                | 4.496761                | -0.335309 | 2.870739  |
| 13               | 1                | 3.954573                | -1.084185 | -2.346461 |
| 14               | 6                | 6.386154                | -1.942784 | -2.211773 |
| 15               | 6                | 1.533184                | 0.168027  | -1.802157 |
| 16               | 1                | -1.248712               | 0.130156  | -3.740232 |
| 17               | 6                | 3.889385                | -0.590852 | -1.383114 |
| 18               | 1                | 8.785526                | -2.351884 | -0.713449 |
| 19               | 6                | 2.645446                | 0.062179  | -1.042138 |
| 20               | 7                | 6.169732                | -1.253046 | -0.954344 |
| 21               | 6                | 0.263197                | 0.855974  | -1.297747 |
| 22               | 6                | 4.985440                | -0.636829 | -0.579057 |
| 23               | 6                | 8.381189                | -1.781500 | 0.116692  |
| 24               | 1                | 7.457229                | -1.910228 | -2.429648 |
| 25               | 6                | 7.106465                | -1.224449 | 0.077825  |
| 26               | 1                | 2.608347                | 0.512547  | -0.059606 |
| 27               | 1                | 10.135854               | -2.016933 | 1.332000  |
| 28               | 6                | 9.137696                | -1.591353 | 1.278598  |
| 29               | 6                | 5.179116                | -0.050591 | 0.833019  |
| 30               | 6                | 6.585937                | -0.514921 | 1.161483  |
| 31               | 16               | 0.464220                | 1.537163  | 0.404620  |
| 32               | 6                | 8.633710                | -0.874069 | 2.362618  |
| 33               | 6                | 7.342404                | -0.331404 | 2.304738  |
| 34               | 1                | 9.238703                | -0.739848 | 3.254218  |
| 35               | 6                | 5.122560                | 1.489443  | 0.817636  |
| 36               | 1                | 4.125254                | 1.855027  | 0.555844  |
| 37               | 1                | 5.376194                | 1.876950  | 1.810310  |
| 38               | 1                | 5.838669                | 1.896227  | 0.096544  |
| 39               | 6                | -0.091314               | 0.351323  | 1.578237  |
| 40               | 7                | -0.962506               | 0.861240  | 2.481234  |
| 41               | 6                | -1.359091               | 0.188250  | 3.575257  |
| 42               | 6                | -0.903214               | -1.095847 | 3.792804  |
| 43               | 6                | -0.059446               | -1.679349 | 2.846000  |
| 44               | 6                | 0.354407                | -0.954051 | 1.733061  |
| 45               | 1                | -2.047143               | 0.704401  | 4.232310  |
| 46               | 1                | -1.222680               | -1.636498 | 4.674592  |
| 47               | 1                | 0.292119                | -2.695983 | 2.984537  |

|     |    |           |           |           |
|-----|----|-----------|-----------|-----------|
| 48  | 1  | 6.067903  | -3.863204 | -3.157099 |
| 49  | 1  | -3.580479 | -2.706844 | 1.028967  |
| 50  | 1  | 2.355562  | -0.908735 | -3.473969 |
| 51  | 6  | 1.432486  | -0.396078 | -3.197757 |
| 52  | 1  | -2.505712 | -1.329710 | 1.294649  |
| 53  | 6  | -3.502691 | -1.724698 | 1.505930  |
| 54  | 1  | -3.603830 | -1.857455 | 2.588140  |
| 55  | 1  | -3.581036 | -0.359898 | -2.385207 |
| 56  | 6  | -1.014619 | 0.093360  | -1.605680 |
| 57  | 1  | 1.297292  | 0.416929  | -3.925440 |
| 58  | 6  | -3.446215 | -0.301918 | -1.310486 |
| 59  | 1  | -8.364057 | -2.112285 | -1.170148 |
| 60  | 6  | -2.142172 | 0.168379  | -0.859142 |
| 61  | 7  | -5.748341 | -0.992156 | -1.069688 |
| 62  | 6  | -4.513551 | -0.641509 | -0.543011 |
| 63  | 1  | 5.896401  | -1.372379 | -3.007016 |
| 64  | 6  | -7.876996 | -2.012300 | -0.205261 |
| 65  | 6  | -6.595510 | -1.485789 | -0.077112 |
| 66  | 1  | -9.529469 | -2.841310 | 0.887616  |
| 67  | 6  | -8.528500 | -2.425677 | 0.962709  |
| 68  | 6  | -4.591661 | -0.777917 | 0.982938  |
| 69  | 6  | 5.968677  | -1.383979 | 1.166860  |
| 70  | 6  | -7.917141 | -2.318877 | 2.211061  |
| 71  | 6  | -6.621962 | -1.791572 | 2.315324  |
| 72  | 1  | -8.441767 | -2.648453 | 3.102790  |
| 73  | 1  | -6.140064 | -1.709222 | 3.286707  |
| 74  | 6  | -4.531355 | 0.595460  | 1.675722  |
| 75  | 1  | -3.592674 | 1.116839  | 1.478583  |
| 76  | 1  | -4.638751 | 0.467988  | 2.758798  |
| 77  | 1  | -5.346158 | 1.237691  | 1.325550  |
| 78  | 16 | 0.186881  | 2.529344  | -2.229401 |
| 79  | 7  | -0.194995 | 5.278394  | -0.777230 |
| 80  | 6  | -1.360387 | 4.358408  | -0.610361 |
| 81  | 1  | 0.035622  | 5.603331  | 0.179773  |
| 82  | 1  | -2.259683 | 4.968629  | -0.737179 |
| 83  | 6  | -1.396238 | 3.282083  | -1.709757 |
| 84  | 1  | -2.084223 | 2.490472  | -1.400426 |
| 85  | 1  | -1.804907 | 3.725598  | -2.621307 |
| 86  | 6  | -1.367175 | 3.924099  | 0.891051  |
| 87  | 8  | -2.178442 | 3.023411  | 1.218935  |
| 88  | 8  | -0.596829 | 4.567659  | 1.636117  |
| 89  | 1  | -1.387379 | 1.791413  | 2.255705  |
| 90  | 1  | -2.110036 | 0.690450  | 0.090877  |
| 91  | 1  | 1.033126  | -1.376954 | 1.001208  |
| 92  | 6  | -6.069580 | -1.031089 | -2.483180 |
| 93  | 6  | -5.664633 | -2.345579 | -3.148571 |
| 94  | 1  | -7.146170 | -0.865907 | -2.585071 |
| 95  | 1  | -4.587294 | -2.516566 | -3.055883 |
| 96  | 1  | -5.920166 | -2.323735 | -4.212727 |
| 97  | 1  | -6.187025 | -3.189231 | -2.685589 |
| 98  | 1  | -5.582111 | -0.179815 | -2.967867 |
| 99  | 1  | 6.944315  | 0.223859  | 3.150818  |
| 100 | 1  | -0.374576 | 6.069345  | -1.397250 |
| 101 | 1  | 0.622036  | 4.765752  | -1.131844 |

**1-GSH** *acyclic* E(RωB97XD) = -2796.2958988 Ha

| Center<br>Number | Atomic<br>Number | Coordinates (Angstroms) |           |           |
|------------------|------------------|-------------------------|-----------|-----------|
|                  |                  | X                       | Y         | Z         |
| 1                | 1                | 0.143219                | -0.115317 | 3.388579  |
| 2                | 1                | -4.534741               | -1.458113 | 3.653244  |
| 3                | 1                | -6.085706               | -2.315046 | 3.547948  |
| 4                | 1                | 0.110877                | 1.353457  | 4.368990  |
| 5                | 6                | -5.621809               | -1.332065 | 3.679874  |
| 6                | 1                | -3.596974               | -3.116813 | -0.080798 |
| 7                | 1                | 2.260309                | 1.142622  | 3.133189  |
| 8                | 6                | 0.121981                | 0.981194  | 3.338760  |
| 9                | 6                | 1.364926                | 1.495886  | 2.617905  |
| 10               | 1                | -2.487963               | -1.966519 | -0.839604 |
| 11               | 6                | -3.497912               | -2.379845 | -0.883735 |
| 12               | 1                | -3.614246               | -2.894918 | -1.843135 |
| 13               | 1                | -3.647775               | 0.408044  | 2.250802  |
| 14               | 6                | -6.087145               | -0.368225 | 2.590118  |
| 15               | 6                | -1.153492               | 0.961764  | 1.173483  |
| 16               | 1                | 1.377445                | 2.593791  | 2.682758  |
| 17               | 6                | -3.492859               | 0.059585  | 1.236085  |
| 18               | 1                | -8.345383               | -1.877968 | 1.699622  |
| 19               | 6                | -2.223767               | 0.357776  | 0.611965  |
| 20               | 7                | -5.739835               | -0.818867 | 1.255695  |
| 21               | 6                | 0.106925                | 1.302214  | 0.386284  |
| 22               | 6                | -4.516403               | -0.610932 | 0.640342  |
| 23               | 6                | -7.854704               | -2.080963 | 0.753088  |
| 24               | 1                | -7.172810               | -0.243035 | 2.627483  |
| 25               | 6                | -6.577623               | -1.607981 | 0.467713  |
| 26               | 1                | -2.142393               | 0.079544  | -0.430647 |
| 27               | 1                | -9.494885               | -3.226723 | -0.026603 |
| 28               | 6                | -8.496984               | -2.846679 | -0.226454 |
| 29               | 6                | -4.561388               | -1.274819 | -0.748999 |
| 30               | 6                | -5.945214               | -1.896358 | -0.742676 |
| 31               | 16               | 0.145768                | 0.583057  | -1.326734 |
| 32               | 6                | -7.880328               | -3.131658 | -1.443981 |
| 33               | 6                | -6.588787               | -2.653173 | -1.705001 |
| 34               | 1                | -8.397816               | -3.728819 | -2.188641 |
| 35               | 6                | -4.449458               | -0.249795 | -1.894024 |
| 36               | 1                | -3.453928               | 0.199367  | -1.951417 |
| 37               | 1                | -4.644893               | -0.746989 | -2.850095 |
| 38               | 1                | -5.182573               | 0.553119  | -1.768510 |
| 39               | 6                | 0.116293                | -1.162517 | -1.120746 |
| 40               | 7                | -0.036916               | -1.870089 | -2.266323 |
| 41               | 6                | -0.068704               | -3.219122 | -2.320454 |
| 42               | 6                | 0.051849                | -3.950855 | -1.163734 |
| 43               | 6                | 0.210641                | -3.262755 | 0.042503  |
| 44               | 6                | 0.246084                | -1.876295 | 0.069260  |
| 45               | 1                | -0.195790               | -3.651280 | -3.303867 |
| 46               | 1                | 0.022184                | -5.031868 | -1.204039 |
| 47               | 1                | 0.310329                | -3.812743 | 0.971916  |
| 48               | 1                | -5.900571               | -0.948118 | 4.666286  |
| 49               | 1                | 4.055608                | -2.689832 | -0.264921 |
| 50               | 1                | -2.022680               | 1.082810  | 3.134050  |
| 51               | 6                | -1.136601               | 1.439068  | 2.606036  |

|     |    |           |           |           |
|-----|----|-----------|-----------|-----------|
| 52  | 1  | 2.923980  | -1.580405 | -1.055321 |
| 53  | 6  | 3.954662  | -1.942575 | -1.058220 |
| 54  | 1  | 4.135352  | -2.433393 | -2.020343 |
| 55  | 1  | 3.959400  | 0.720063  | 2.198460  |
| 56  | 6  | 1.407813  | 1.077258  | 1.165075  |
| 57  | 1  | -1.177088 | 2.538849  | 2.628028  |
| 58  | 6  | 3.821077  | 0.393833  | 1.173795  |
| 59  | 1  | 8.786386  | -1.253511 | 1.554554  |
| 60  | 6  | 2.525993  | 0.608112  | 0.569242  |
| 61  | 7  | 6.120962  | -0.335781 | 1.152256  |
| 62  | 6  | 4.882080  | -0.187387 | 0.550492  |
| 63  | 1  | -5.660245 | 0.628403  | 2.738691  |
| 64  | 6  | 8.302440  | -1.458226 | 0.604916  |
| 65  | 6  | 6.998325  | -1.052613 | 0.338666  |
| 66  | 1  | 10.001536 | -2.484622 | -0.214036 |
| 67  | 6  | 8.982159  | -2.157555 | -0.398770 |
| 68  | 6  | 4.961781  | -0.794541 | -0.863082 |
| 69  | 6  | 6.376346  | -1.342824 | -0.876748 |
| 70  | 6  | 8.375894  | -2.443114 | -1.621335 |
| 71  | 6  | 7.057426  | -2.032743 | -1.863225 |
| 72  | 1  | 8.922662  | -2.987876 | -2.384997 |
| 73  | 1  | 6.579961  | -2.258197 | -2.813898 |
| 74  | 6  | 4.804902  | 0.275776  | -1.960814 |
| 75  | 1  | 3.796914  | 0.699612  | -1.980193 |
| 76  | 1  | 4.999196  | -0.173700 | -2.940558 |
| 77  | 1  | 5.518219  | 1.092177  | -1.810016 |
| 78  | 16 | 0.133278  | 3.142356  | -0.030227 |
| 79  | 7  | -0.977388 | 4.287178  | -2.771447 |
| 80  | 6  | -1.678605 | 4.631883  | -1.496178 |
| 81  | 1  | -0.591964 | 5.191354  | -3.107565 |
| 82  | 1  | -2.729819 | 4.795890  | -1.746622 |
| 83  | 6  | -1.602805 | 3.498601  | -0.482220 |
| 84  | 1  | -2.164401 | 3.794546  | 0.404768  |
| 85  | 1  | -2.058825 | 2.593686  | -0.892434 |
| 86  | 6  | -1.100473 | 6.002680  | -1.014529 |
| 87  | 8  | -1.416926 | 6.351079  | 0.136923  |
| 88  | 8  | -0.409671 | 6.612217  | -1.871101 |
| 89  | 1  | -0.141090 | -1.365519 | -3.143669 |
| 90  | 1  | 2.454250  | 0.366548  | -0.483330 |
| 91  | 1  | 0.376631  | -1.344799 | 1.001233  |
| 92  | 6  | 6.445223  | 0.083420  | 2.502616  |
| 93  | 6  | 6.054741  | -0.953945 | 3.553640  |
| 94  | 1  | 7.519825  | 0.282393  | 2.541019  |
| 95  | 1  | 4.978775  | -1.153542 | 3.525546  |
| 96  | 1  | 6.312620  | -0.592145 | 4.554012  |
| 97  | 1  | 6.584509  | -1.896337 | 3.379977  |
| 98  | 1  | 5.951001  | 1.040863  | 2.693254  |
| 99  | 1  | -6.102447 | -2.878958 | -2.651061 |
| 100 | 1  | -1.579384 | 3.860504  | -3.476322 |
| 101 | 1  | -0.181498 | 3.662513  | -2.599824 |

**Cy7-PyrH** E(RPBE0) = -2073.7125673 Ha

Center Atomic Coordinates (Angstroms)  
Number Number X Y Z

|    |    |           |           |           |
|----|----|-----------|-----------|-----------|
| 1  | 1  | 0.025392  | 3.752891  | -0.890946 |
| 2  | 1  | 5.498401  | 3.649590  | -0.626876 |
| 3  | 1  | 7.246647  | 3.378413  | -0.707882 |
| 4  | 1  | -6.643093 | 4.486491  | 0.176176  |
| 5  | 1  | -0.021422 | 4.600776  | 0.649515  |
| 6  | 6  | 6.406625  | 3.543341  | -0.030422 |
| 7  | 1  | 5.029661  | 0.000833  | -2.709181 |
| 8  | 1  | -2.145877 | 3.381436  | 0.131579  |
| 9  | 6  | -0.014799 | 3.608243  | 0.193848  |
| 10 | 6  | -1.283514 | 2.861607  | 0.555688  |
| 11 | 1  | 3.520247  | -0.752317 | -2.172577 |
| 12 | 6  | 4.607634  | -0.816704 | -2.121510 |
| 13 | 1  | 4.911578  | -1.760075 | -2.580066 |
| 14 | 1  | 3.749726  | 2.238937  | 0.645573  |
| 15 | 6  | 6.278112  | 2.404848  | 0.966185  |
| 16 | 6  | 1.217717  | 1.431545  | 0.095953  |
| 17 | 1  | -1.424165 | 2.867282  | 1.644295  |
| 18 | 6  | 3.683758  | 1.256394  | 0.196471  |
| 19 | 1  | 8.891918  | 1.393304  | 0.562012  |
| 20 | 6  | 2.425486  | 0.759901  | -0.109926 |
| 21 | 7  | 6.071321  | 1.117606  | 0.320000  |
| 22 | 6  | -0.025058 | 0.825188  | -0.163834 |
| 23 | 6  | 4.885136  | 0.589521  | -0.026886 |
| 24 | 1  | -5.520435 | 2.686416  | 1.488645  |
| 25 | 6  | 8.494584  | 0.494363  | 0.106900  |
| 26 | 1  | 7.179056  | 2.315423  | 1.574274  |
| 27 | 6  | 7.135474  | 0.285195  | -0.054284 |
| 28 | 1  | 2.358643  | -0.231216 | -0.538047 |
| 29 | 1  | 10.417852 | -0.375265 | -0.241634 |
| 30 | 6  | 9.347082  | -0.504948 | -0.350048 |
| 31 | 6  | 5.116717  | -0.773612 | -0.674227 |
| 32 | 6  | 6.623010  | -0.859274 | -0.648947 |
| 33 | 16 | -0.026226 | -0.812602 | -0.896310 |
| 34 | 6  | 8.850464  | -1.660031 | -0.942481 |
| 35 | 6  | 7.477876  | -1.845013 | -1.096549 |
| 36 | 1  | 9.537649  | -2.422752 | -1.290055 |
| 37 | 1  | 7.096556  | -2.748167 | -1.561407 |
| 38 | 6  | 4.514385  | -1.906364 | 0.170441  |
| 39 | 1  | 3.425219  | -1.863552 | 0.187711  |
| 40 | 1  | 4.808469  | -2.867347 | -0.256664 |
| 41 | 1  | 4.877195  | -1.862966 | 1.199104  |
| 42 | 6  | 0.071052  | -1.853654 | 0.500327  |
| 43 | 7  | 0.150706  | -3.174532 | 0.240461  |
| 44 | 6  | 0.228021  | -4.119113 | 1.194875  |
| 45 | 6  | 0.230969  | -3.756528 | 2.513454  |
| 46 | 6  | 0.149763  | -2.400203 | 2.825838  |
| 47 | 6  | 0.069186  | -1.449361 | 1.828662  |
| 48 | 1  | 0.287348  | -5.140541 | 0.846208  |
| 49 | 1  | 0.294704  | -4.515396 | 3.280187  |
| 50 | 1  | 0.148039  | -2.082966 | 3.861873  |
| 51 | 1  | 0.003409  | -0.396051 | 2.062243  |
| 52 | 1  | -5.556335 | 3.571310  | -0.879684 |
| 53 | 1  | -7.303467 | 3.288320  | -0.945753 |
| 54 | 1  | 6.577318  | 4.478792  | 0.505231  |
| 55 | 6  | -6.467002 | 3.511059  | -0.280499 |

|    |   |            |           |           |
|----|---|------------|-----------|-----------|
| 56 | 1 | -5.076875  | -0.200620 | -2.665367 |
| 57 | 1 | 2.111943   | 3.359802  | 0.313367  |
| 58 | 6 | 1.211610   | 2.835983  | 0.640660  |
| 59 | 1 | -3.558469  | -0.894146 | -2.076795 |
| 60 | 6 | -4.644902  | -0.969255 | -2.021692 |
| 61 | 1 | -4.936755  | -1.946463 | -2.412145 |
| 62 | 1 | -3.805953  | 2.273393  | 0.530406  |
| 63 | 6 | -6.339247  | 2.458226  | 0.806260  |
| 64 | 6 | -1.269628  | 1.436343  | 0.066697  |
| 65 | 1 | 1.252939   | 2.800923  | 1.737078  |
| 66 | 6 | -3.734734  | 1.262128  | 0.151149  |
| 67 | 1 | -8.946162  | 1.403052  | 0.476353  |
| 68 | 6 | -2.474821  | 0.749589  | -0.113943 |
| 69 | 7 | -6.122933  | 1.124236  | 0.266296  |
| 70 | 6 | -4.933522  | 0.576587  | -0.032339 |
| 71 | 1 | 5.454493   | 2.573498  | 1.660231  |
| 72 | 6 | -8.542628  | 0.474421  | 0.091860  |
| 73 | 1 | -7.243359  | 2.413506  | 1.414406  |
| 74 | 6 | -7.181975  | 0.260479  | -0.048013 |
| 75 | 1 | -2.401191  | -0.265668 | -0.479696 |
| 76 | 1 | -10.460063 | -0.429024 | -0.197613 |
| 77 | 6 | -9.388235  | -0.560797 | -0.291958 |
| 78 | 6 | -5.155750  | -0.830417 | -0.580783 |
| 79 | 6 | -6.661361  | -0.922712 | -0.552736 |
| 80 | 6 | -8.883451  | -1.754470 | -0.794320 |
| 81 | 6 | -7.509441  | -1.943577 | -0.928863 |
| 82 | 1 | -9.565548  | -2.544586 | -1.086259 |
| 83 | 1 | -7.121483  | -2.876807 | -1.323515 |
| 84 | 6 | -4.547259  | -1.899042 | 0.339332  |
| 85 | 1 | -3.458124  | -1.852460 | 0.350236  |
| 86 | 1 | -4.839771  | -2.888082 | -0.019342 |
| 87 | 1 | -4.907996  | -1.785610 | 1.363409  |
| 88 | 1 | 0.154111   | -3.481172 | -0.726996 |

**Cy7-SMe** E(RPBE0) = -1865.6770065 Ha

| Center<br>Number | Atomic<br>Number | Coordinates (Angstroms) |           |           |
|------------------|------------------|-------------------------|-----------|-----------|
|                  |                  | X                       | Y         | Z         |
| 1                | 1                | -0.323483               | 3.116373  | 1.571349  |
| 2                | 1                | -5.616632               | 3.175849  | 0.677237  |
| 3                | 1                | -7.360721               | 2.876910  | 0.609147  |
| 4                | 1                | 6.642765                | 3.860416  | 1.360342  |
| 5                | 1                | -0.066747               | 4.320283  | 0.314000  |
| 6                | 6                | -6.483343               | 3.138458  | 0.014310  |
| 7                | 1                | -5.198634               | -0.696882 | 2.295719  |
| 8                | 1                | 1.995774                | 2.966456  | 0.918990  |
| 9                | 6                | -0.094914               | 3.245428  | 0.507898  |
| 10               | 6                | 1.251464                | 2.624873  | 0.192258  |
| 11               | 1                | -3.635973               | -1.343087 | 1.771398  |
| 12               | 6                | -4.715533               | -1.423414 | 1.639396  |
| 13               | 1                | -5.021764               | -2.423872 | 1.952909  |
| 14               | 1                | -3.754935               | 1.975618  | -0.651475 |
| 15               | 6                | -6.270191               | 2.140421  | -1.110547 |
| 16               | 6                | -1.239715               | 1.106676  | -0.027965 |



|    |    |            |           |           |
|----|----|------------|-----------|-----------|
| 17 | 1  | 1.600666   | 2.977576  | -0.786983 |
| 18 | 6  | -3.698951  | 0.944442  | -0.325669 |
| 19 | 1  | -8.878124  | 1.031106  | -1.017627 |
| 20 | 6  | -2.452132  | 0.420249  | -0.002398 |
| 21 | 7  | -6.072143  | 0.784053  | -0.626343 |
| 22 | 6  | -0.018777  | 0.440798  | 0.202349  |
| 23 | 6  | -4.892326  | 0.237824  | -0.271084 |
| 24 | 1  | 5.472653   | 2.834225  | -0.588156 |
| 25 | 6  | -8.484279  | 0.088049  | -0.658785 |
| 26 | 1  | -7.131023  | 2.119674  | -1.780173 |
| 27 | 6  | -7.132248  | -0.111346 | -0.436053 |
| 28 | 1  | -2.387449  | -0.619916 | 0.288185  |
| 29 | 1  | -10.400358 | -0.858791 | -0.557109 |
| 30 | 6  | -9.335375  | -0.980330 | -0.394591 |
| 31 | 6  | -5.128041  | -1.203633 | 0.177526  |
| 32 | 6  | -6.626857  | -1.314491 | 0.037699  |
| 33 | 16 | -0.039856  | -1.330795 | 0.448227  |
| 34 | 6  | -8.845179  | -2.192990 | 0.074386  |
| 35 | 6  | -7.479860  | -2.367391 | 0.294697  |
| 36 | 1  | -9.530541  | -3.008943 | 0.272764  |
| 37 | 1  | -7.101865  | -3.315544 | 0.662894  |
| 38 | 6  | -4.437848  | -2.207844 | -0.757655 |
| 39 | 1  | -3.351187  | -2.147607 | -0.686991 |
| 40 | 1  | -4.739341  | -3.220656 | -0.481460 |
| 41 | 1  | -4.727048  | -2.036865 | -1.796488 |
| 42 | 6  | 0.495323   | -1.457224 | 2.177101  |
| 43 | 1  | 5.562232   | 2.577469  | 1.925614  |
| 44 | 1  | 7.305870   | 2.285789  | 1.820560  |
| 45 | 1  | -6.638434  | 4.134397  | -0.404535 |
| 46 | 6  | 6.460984   | 2.784302  | 1.341280  |
| 47 | 1  | 5.069643   | -1.592415 | 1.866024  |
| 48 | 1  | -2.150263  | 3.044298  | -0.088596 |
| 49 | 6  | -1.187154  | 2.583642  | -0.314563 |
| 50 | 1  | 3.528525   | -1.968131 | 1.078314  |
| 51 | 6  | 4.612138   | -1.999409 | 0.962208  |
| 52 | 1  | 4.909701   | -3.046198 | 0.869667  |
| 53 | 1  | 3.763723   | 2.052636  | 0.143142  |
| 54 | 6  | 6.298819   | 2.320101  | -0.095706 |
| 55 | 6  | 1.220615   | 1.116362  | 0.184445  |
| 56 | 1  | -1.000271  | 2.752937  | -1.383098 |
| 57 | 6  | 3.685446   | 0.977122  | 0.042407  |
| 58 | 1  | 8.890506   | 1.200806  | -0.369242 |
| 59 | 6  | 2.415518   | 0.408994  | 0.091647  |
| 60 | 7  | 6.068845   | 0.888613  | -0.199231 |
| 61 | 6  | 4.869230   | 0.275687  | -0.133822 |
| 62 | 1  | -5.410278  | 2.411401  | -1.724026 |
| 63 | 6  | 8.473147   | 0.203188  | -0.430588 |
| 64 | 1  | 7.192203   | 2.545130  | -0.679633 |
| 65 | 6  | 7.111297   | -0.034259 | -0.349026 |
| 66 | 1  | 2.319071   | -0.666529 | 0.009700  |
| 67 | 1  | 10.373902  | -0.752773 | -0.656879 |
| 68 | 6  | 9.302237   | -0.902611 | -0.590032 |
| 69 | 6  | 5.074239   | -1.231038 | -0.283448 |
| 70 | 6  | 6.575805   | -1.313544 | -0.412989 |
| 71 | 6  | 8.781761   | -2.188945 | -0.661992 |
| 72 | 6  | 7.407162   | -2.402378 | -0.572529 |

|    |   |           |           |           |
|----|---|-----------|-----------|-----------|
| 73 | 1 | 9.450230  | -3.033075 | -0.786273 |
| 74 | 1 | 7.005155  | -3.408780 | -0.627472 |
| 75 | 6 | 4.403401  | -1.770716 | -1.554806 |
| 76 | 1 | 3.316052  | -1.711078 | -1.493750 |
| 77 | 1 | 4.678984  | -2.819081 | -1.689225 |
| 78 | 1 | 4.731073  | -1.215202 | -2.435729 |
| 79 | 1 | 0.506129  | -2.522904 | 2.407927  |
| 80 | 1 | -0.217578 | -0.952348 | 2.827592  |
| 81 | 1 | 1.493383  | -1.044935 | 2.316692  |

**Cy7-SMe** E(RPBE0) = -1522.922675 Ha

| Center<br>Number | Atomic<br>Number | Coordinates (Angstroms) |           |           |
|------------------|------------------|-------------------------|-----------|-----------|
|                  |                  | X                       | Y         | Z         |
| -----            |                  |                         |           |           |
| 1                | 1                | 0.750292                | 2.794225  | 1.475483  |
| 2                | 1                | -5.420815               | 2.132839  | 2.483537  |
| 3                | 1                | -7.180686               | 1.982429  | 2.359895  |
| 4                | 1                | 6.312832                | 4.063760  | -1.254670 |
| 5                | 1                | 0.152854                | 3.989810  | 0.331021  |
| 6                | 6                | -6.306962               | 2.505597  | 1.965876  |
| 7                | 1                | -5.235243               | -1.975375 | 1.614614  |
| 8                | 1                | 2.005650                | 2.716692  | -0.683257 |
| 9                | 6                | 0.227628                | 2.916043  | 0.521180  |
| 10               | 6                | 1.039242                | 2.226336  | -0.568696 |
| 11               | 1                | -3.698232               | -2.255583 | 0.786716  |
| 12               | 6                | -4.779558               | -2.221416 | 0.653423  |
| 13               | 1                | -5.117019               | -3.217981 | 0.359817  |
| 14               | 1                | -3.678732               | 1.838774  | 0.621561  |
| 15               | 6                | -6.187203               | 2.308843  | 0.464316  |
| 16               | 6                | -1.200221               | 0.818901  | 0.374770  |
| 17               | 1                | 0.517918                | 2.316886  | -1.529951 |
| 18               | 6                | -3.665259               | 0.805916  | 0.296314  |
| 19               | 1                | -8.846798               | 1.418540  | 0.038904  |
| 20               | 6                | -2.412604               | 0.181480  | 0.200781  |
| 21               | 7                | -6.050600               | 0.913672  | 0.088007  |
| 22               | 6                | 0.017764                | 0.092114  | 0.207829  |
| 23               | 6                | -4.884685               | 0.227393  | 0.009946  |
| 24               | 1                | 5.276397                | 2.001214  | -2.195879 |
| 25               | 6                | -8.492599               | 0.429692  | -0.226178 |
| 26               | 1                | -7.068967               | 2.696620  | -0.048193 |
| 27               | 6                | -7.146793               | 0.102160  | -0.218456 |
| 28               | 1                | -2.384020               | -0.861407 | -0.086682 |
| 29               | 1                | -10.451123              | -0.346870 | -0.601254 |
| 30               | 6                | -9.390428               | -0.571381 | -0.585215 |
| 31               | 6                | -5.189036               | -1.207443 | -0.423004 |
| 32               | 6                | -6.693993               | -1.170224 | -0.542599 |
| 33               | 7                | 0.056492                | -1.249869 | 0.349417  |
| 34               | 6                | -8.952551               | -1.846859 | -0.918288 |
| 35               | 6                | -7.592595               | -2.154381 | -0.896915 |
| 36               | 1                | -9.672846               | -2.608567 | -1.193785 |
| 37               | 1                | -7.253783               | -3.152738 | -1.154559 |
| 38               | 6                | -4.557402               | -1.541281 | -1.780997 |
| 39               | 1                | -3.468382               | -1.568247 | -1.727159 |
| 40               | 1                | -4.904154               | -2.523638 | -2.109751 |

|    |   |           |           |           |
|----|---|-----------|-----------|-----------|
| 41 | 1 | -4.845846 | -0.807081 | -2.535857 |
| 42 | 1 | 5.367046  | 3.251741  | 0.001951  |
| 43 | 1 | 7.131751  | 3.111056  | -0.008473 |
| 44 | 1 | -6.414197 | 3.568392  | 2.191185  |
| 45 | 6 | 6.244051  | 3.162484  | -0.642361 |
| 46 | 1 | 5.258319  | -0.243461 | 2.380094  |
| 47 | 1 | -1.632606 | 2.557358  | 1.556369  |
| 48 | 6 | -1.166342 | 2.312293  | 0.594888  |
| 49 | 1 | 3.764238  | -1.109544 | 1.996224  |
| 50 | 6 | 4.848897  | -1.124285 | 1.881490  |
| 51 | 1 | 5.230386  | -2.012888 | 2.389756  |
| 52 | 1 | 3.655241  | 1.664579  | -1.027673 |
| 53 | 6 | 6.144239  | 1.938645  | -1.537227 |
| 54 | 6 | 1.213635  | 0.786254  | -0.179785 |
| 55 | 1 | -1.795868 | 2.782803  | -0.170352 |
| 56 | 6 | 3.676203  | 0.714729  | -0.508225 |
| 57 | 1 | 8.836172  | 1.099864  | -1.220285 |
| 58 | 6 | 2.444871  | 0.179319  | -0.086871 |
| 59 | 7 | 6.056793  | 0.698398  | -0.790027 |
| 60 | 6 | 4.910838  | 0.136547  | -0.322530 |
| 61 | 1 | -5.333012 | 2.855076  | 0.061003  |
| 62 | 6 | 8.516299  | 0.219061  | -0.676760 |
| 63 | 1 | 7.017148  | 1.864359  | -2.187950 |
| 64 | 6 | 7.180387  | -0.043232 | -0.419878 |
| 65 | 1 | 2.476681  | -0.797729 | 0.382373  |
| 66 | 1 | 10.504164 | -0.518063 | -0.384889 |
| 67 | 6 | 9.450586  | -0.696356 | -0.200251 |
| 68 | 6 | 5.266480  | -1.161807 | 0.406241  |
| 69 | 6 | 6.773008  | -1.165064 | 0.291516  |
| 70 | 6 | 9.058031  | -1.825632 | 0.506422  |
| 71 | 6 | 7.707132  | -2.065969 | 0.757042  |
| 72 | 1 | 9.805627  | -2.522499 | 0.867548  |
| 73 | 1 | 7.403044  | -2.948410 | 1.310960  |
| 74 | 6 | 4.690206  | -2.391762 | -0.309038 |
| 75 | 1 | 3.601465  | -2.421726 | -0.256907 |
| 76 | 1 | 5.073771  | -3.298372 | 0.164586  |
| 77 | 1 | 4.983972  | -2.404951 | -1.360418 |
| 78 | 6 | -0.690676 | -2.061931 | 1.287910  |
| 79 | 1 | 0.007244  | -2.684746 | 1.851562  |
| 80 | 1 | -1.402205 | -2.723263 | 0.785813  |
| 81 | 1 | -1.231700 | -1.423872 | 1.984684  |
| 82 | 1 | 0.861674  | -1.704127 | -0.049516 |
